# Supplementary material for: Thawing permafrost poses environmental threat to thousands of sites with legacy industrial contamination.
Source: Research Square preprint supplement (doi:10.21203/rs.3.rs-1389869/v1), 2022-03-02
Supplement: Supplementary file 1 [file 4151e6fcb5038d4aba6bf8d1.doc]

**Supplementary Information for**

**Thawing permafrost poses environmental threat to thousands of sites with legacy industrial contamination**

Moritz Langer1,2, Thomas Schneider von Deimling1,2, Sebastian Westermann3, Rebecca Rolph1,2, Ralph Rutte4, Volker Rachold5, Michael Schultz6, Guido Grosse1,7

1 Permafrost Research Section, Alfred Wegener Institute Helmholtz Centre for Polar and Marine Research, Telegrafenberg A45, 14473 Potsdam, Germany

2 Geography Department, Humboldt-Universität zu Berlin, Unter den Linden 6, 10099 Berlin, Germany

3 Department of Geosciences, University of Oslo, Sem Sælands vei 1, 0316 Oslo, Norway

4 Freelancer, Nonnenwaldstr. 10, 65817 Eppstein, Germany

5 German Arctic Office, Alfred Wegener Institute Helmholtz Centre for Polar and Marine Research, Telegrafenberg A45, 14473 Potsdam, Germany

6 GIScience, Heidelberg University, Im Neuenheimer Feld 348, 69120 Heidelberg, Germany

7 Institute of Geosciences, University of Potsdam, Karl-Liebknecht-Str. 24-25,

14476 Potsdam, Germany

Corresponding author: Moritz Langer

Email: moritz.langer@awi.de

**This PDF file includes:**

Tables S1

Figures S1 to S5

SI References

Table S1. Overview of different types of toxic industrial substances stored, spilled, or lost in or on top of permafrost based on an exemplary literature review.

| Sector | Activity group | Example of pollutants / damages | References |
| --- | --- | --- | --- |
| Energy | Resource exploration  and transportation | Drilling fluids (surfactants, detergents, large quantities of highly concentrated saline solutions primarily potassium chloride), fuel | *13, 54, 55, 56, 57* |
| Industrial Production and Product Use (IPPU) | Mining  Military | fuel, radioactive waste, acid mine drainage (Al, Mn, Cu, Hg), flotation chemicals, mining leachate | *14, 18, 58, 59, 60, 61, 62, 63, 64* |
| Waste | Industrial landfills | Heavy metal contamination (e.g. Cadmium, Mercury, and Lead), organic waste, synthetic materials | *12, 65, 66, 67, 68* |
| Agriculture, Forestry and Other Land Uses (AFOLU) | Pollution | Deforestation, agriculture, urbanization | *69* |
| Other | Accidental | Hydrocarbon (oil, diesel, etc) spills, nuclear accidents and non industrial wastes | *70, 71, 72, 73* |


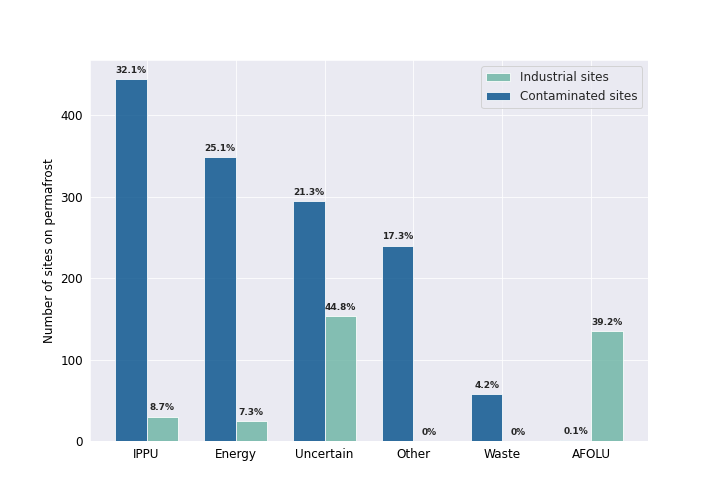


Figure S1: Occurrence of industrial sites and contaminated sites on continuous and discontinuous permafrost in Alaska according to industrial sectors defined by the performed semantic classification (see Extended Data Fig. 4). Numbers on the bars indicate relative occurrence. More than 50% of the existing contaminated sites are attributed to industry within the sectors Industrial Processes and Product Use (IPPU) and Energy which together represent less than 20% of the existing industrial sites. Agriculture, forestry, and other land uses (AFOLU) account for the largest known number of industrial sites in Alaska.


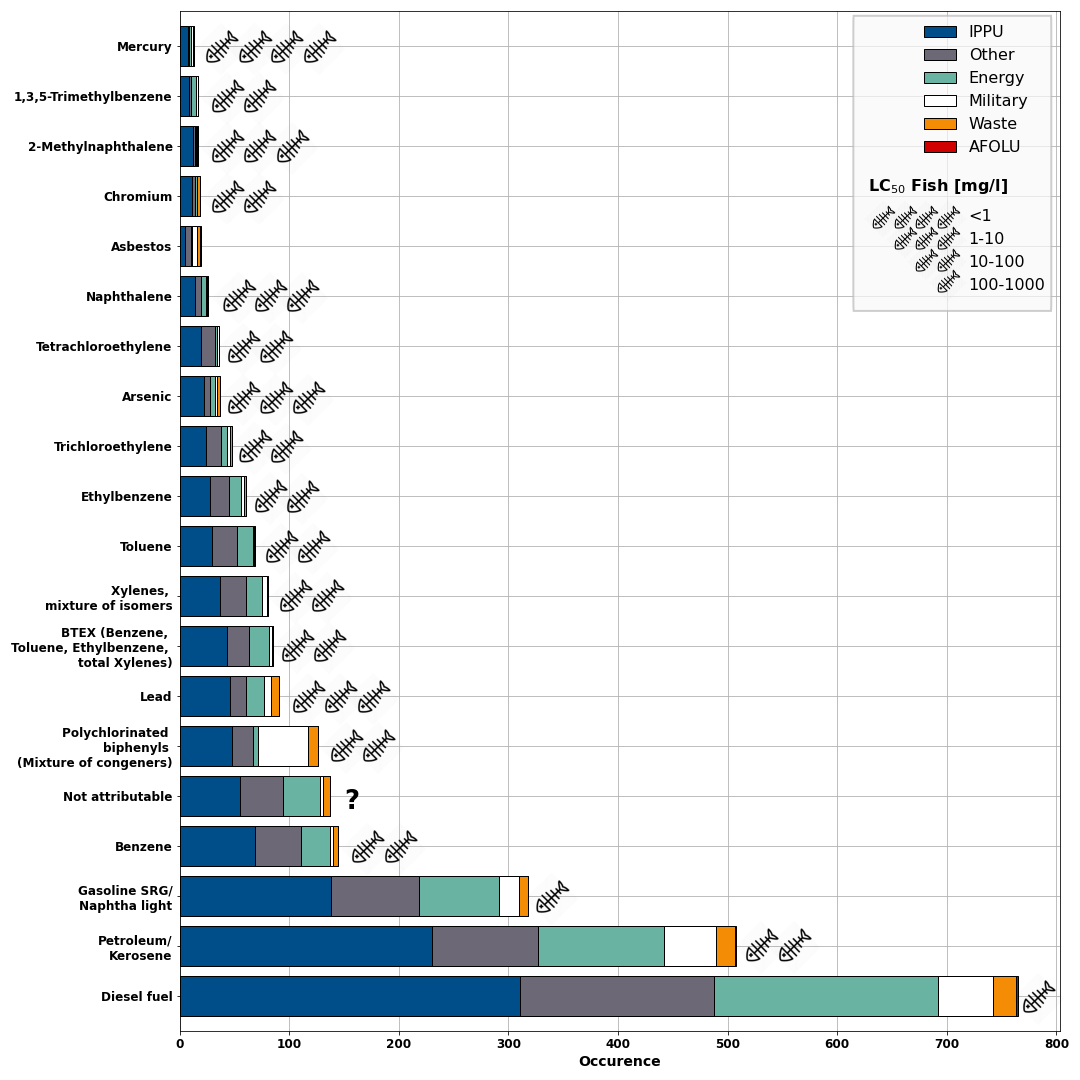


Figure S2: Top 20 toxic substances and their occurrence within the reports of the Contaminated Sites Program (CSP) in Alaska. The occurrence is further differentiated according to the industrial sectors Industrial Processes and Product Use (IPPU), Energy, Military, Waste, and Agriculture, forestry, and other land uses (AFOLU). Aquatic toxicities of the substances are provided as median lethal concentration for fish (LC50 Fish) after 96 hours.


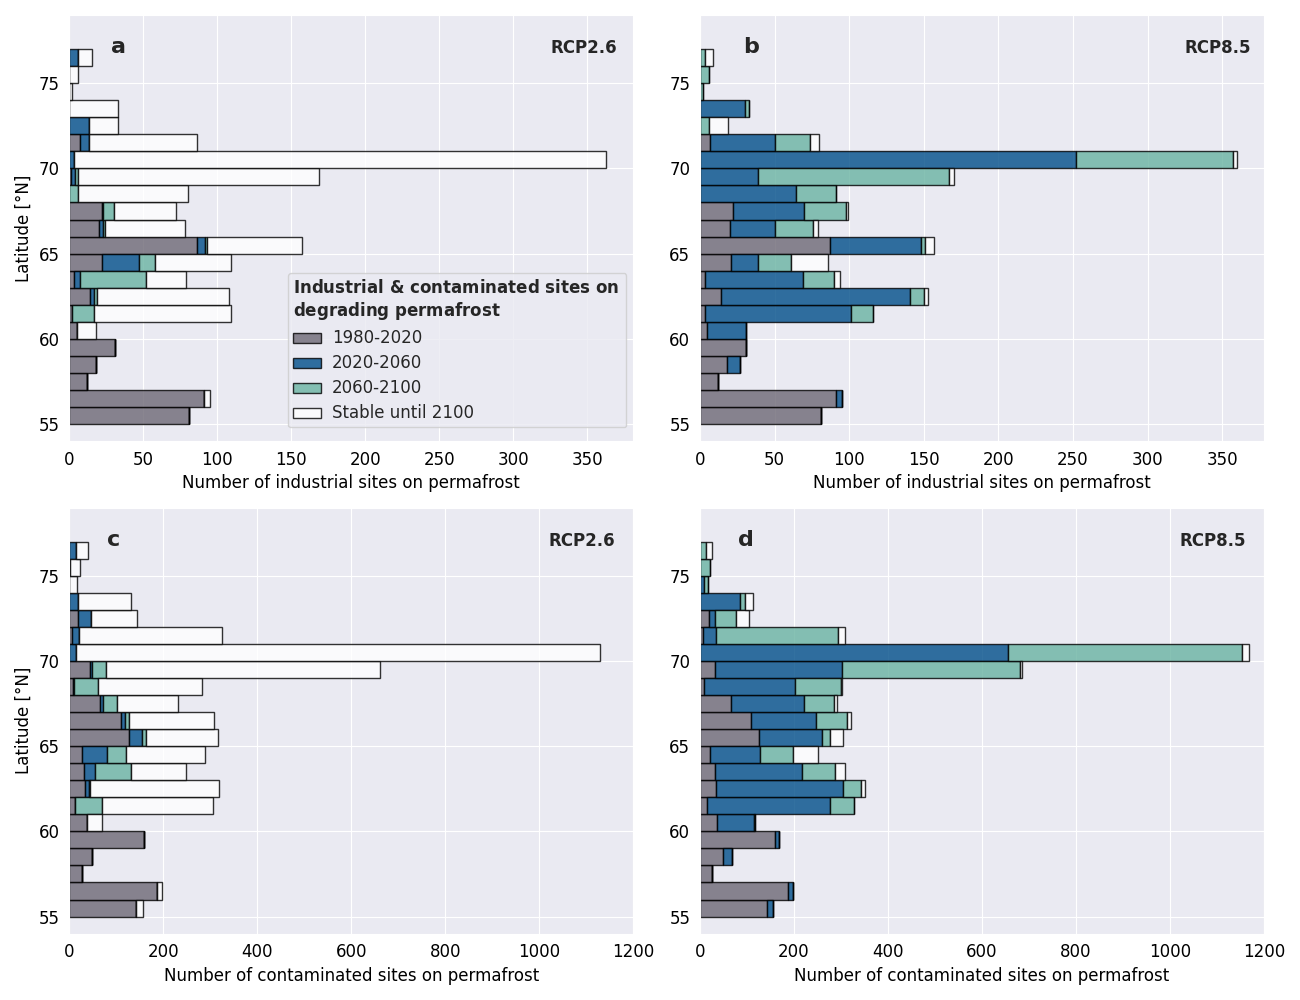


Figure S3: The latitudinal distributions of industrial sites (a, b) and contaminated sites (c, d) that experience permafrost degradation in different time frames illustrated for the (a,c) “best case” (CCSM4, RCP2.6) and (b, d) “worst case” scenario (HADGEM2-ES, RCP8.5).


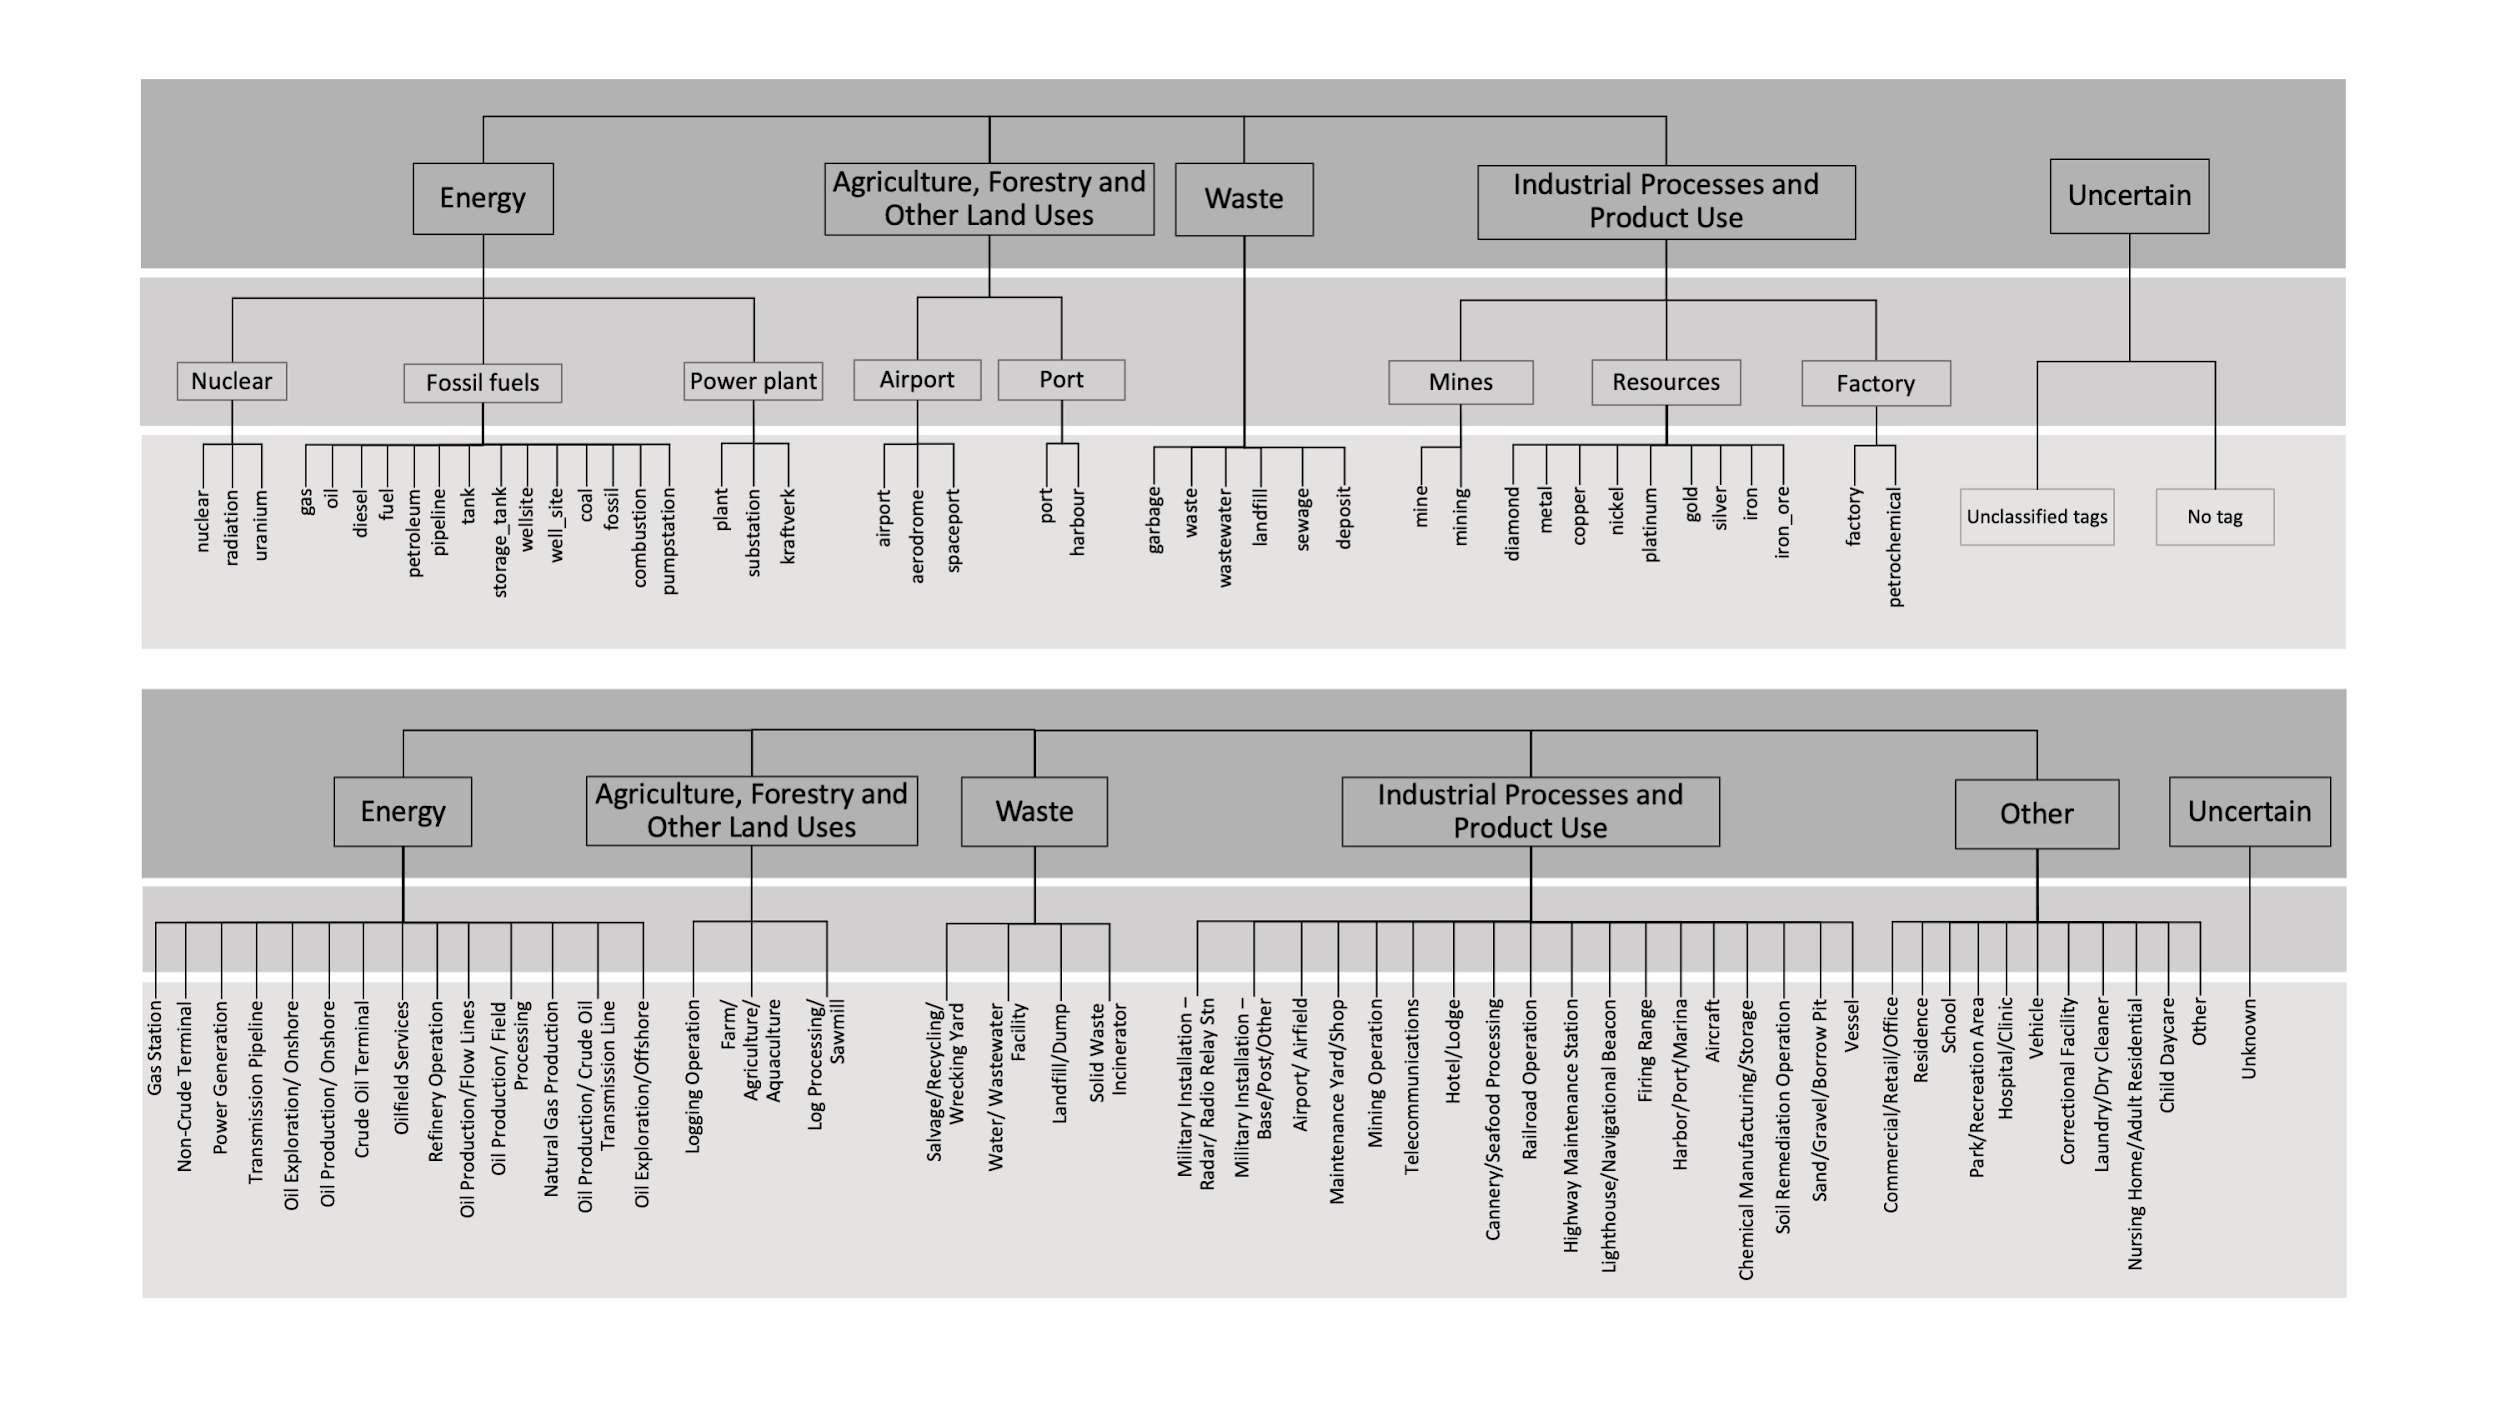


Figure S4: The dendrogramms illustrate the semantic classification performed on the database of industrial sites synergized from from OpenStreetMap (OSM) and the Nordregio Atlas of population, society and economy in the Arctic from 2019 (top) and the database of contaminated sites from the Contaminated Sites Program (CSP) in Alaska published by the U.S. Department of Environmental Conservation (bottom). After cleaning and translation of the site descriptions, the sites are classified into industrial sectors according to descriptions used by the Intergovernmental Panel on Climate Change (IPCC).


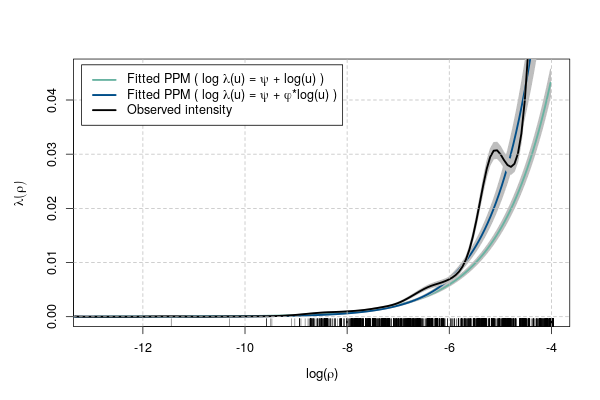


Figure S5: Observed and modeled point intensities of contaminated sites λ with the point density of industrial sites ρ for the continuous and discontinuous permafrost domain of Alaska (A). We apply two basic inhomogeneous poisson point models (PPM) where the covariate ρ is the density of industrial sites at any location of the spatial domain, ψ and φ are unknown scale parameters which are derived by model fitting, and λ(ρ) is the expected conditional intensity of contamination within the investigated spatial domain. The shaded areas around the curves relate to the 95% confidence intervals of the fitted parameters. The curves indicate that the assumed inhomogeneous poisson process models only partly represent the observations and tend to underestimate the real intensity and thus the total count.

**SI References:**

54.) E. M. Chuvilin, E. D. Yershov, N. S. Naletova, E. S. Miklyaeva, The use of permafrost for the storage of oil and oil products. *Polar Record* **36**(198), 211-214 (2000).

55.) E. V. Abakumov *et al.*, Polycyclic aromatic hydrocarbons in insular and coastal soils of the Russian Arctic. *Eurasian Soil Science* **48**(12), 1300-1305 (2015).

56.) J. R. Thienpont *et al.*, Exploratory hydrocarbon drilling impacts to Arctic lake ecosystems. *PLoS One* **8**(11), e78875 (2013).

57.) J. Søndergaard, B. Elberling, G. Asmund, Metal speciation and bioavailability in acid mine drainage from a high Arctic coal mine waste rock pile: Temporal variations assessed through high-resolution water sampling, geochemical modelling and DGT. *Cold regions science and technology* **54**(2), 89-96 (2008).

58.) E. D. Ershov, S. Y. Parmuzin, S. Y. Lobanov, V. V. Lopatin, “Problems of radioactive waste burial in perennially frozen ground” in *Proceedings of the 10th International Conference on Permafrost*, M. Phillips, S. M. Springman, L. U. Arenson, Eds. (Swets and Zeitlinger, Lisse, Zurich, Switzerland, 2003) pp. 235-238.

59.) B. K. Biskaborn *et al.*, Effects of climate change and industrialization on Lake Bolshoe Toko, eastern Siberia. *Journal of Paleolimnology* **65***,* 1-18 (2021).

60.) M. Dowdall *et al.*, Assessment of the radiological impacts of historical coal mining operations on the environment of Ny-Ålesund, Svalbard. *Journal of environmental radioactivity* **71**(2), 101-114 (2004).

61.) L. Bach, R. D. Nørregaard, V. Hansen, K. Gustavson, Review on environmental risk assessment of mining chemicals used for mineral separation in the mineral resources industry and recommendations for Greenland*. Scientific Report from DCE–Danish Centre for Environment and Energy*, 203 (2016).

62.) R. Edson, G. L. Johnson, L. A. Codispoti, T. Curtin, ANWAP Science Team. The Arctic Nuclear Waste Assessment Program. *Oceanography* **10**(1), 4-10 (1997).

63.) J. Skorve, The environment of the nuclear test sites on Novaya Zemlya. *Science of the total environment* **202**(1-3), 167-172 (1997).

64.) Bond, M. J. & Carr, J. Permafrost thaw and implications for the fate and transport of tritium in the Canadian north. *Journal of environmental Radioactivity* **192**, 295-311 (2018).

65.) V. Grebenets, F. Iurov, V. Tolmanov, Negative changes in permafrost due to waste storage. In *EGU General Assembly Conference Abstracts,* 6824 (2020).

66.) P. Groisman *et al.*, Northern Eurasia Future Initiative (NEFI): facing the challenges and pathways of global change in the twenty-first century. *Progress in Earth and Planetary Science* **4**(1), 1-48 (2017).

67.) K. McCarthy, L. Walker, L. Vigoren, Subsurface fate of spilled petroleum hydrocarbons in continuous permafrost. *Cold regions science and technology* **38**(1), 43-54 (2004).

68.) K. L. Young, K. Lund, An investigation of cadmium and lead from a High Arctic waste disposal site, Resolute Bay, Nunavut, Canada. *Hydrology Research* **37**(4-5), 441-453 (2006).

69.) B. A. Revich, M. A. Podolnaya, Thawing of permafrost may disturb historic cattle burial grounds in East Siberia. *Global health action* **4**(1), 8482 (2011).

70.) D. M. Filler, M. C. Kennicutt, I. Snape, S. T. Sweet, A. G. Klein, “Arctic and Antarctic spills” in *Handbook of oil spill science and technology,* M. Fingas, Eds.(John Wiley & Sons, Inc. Hoboken 2015), pp. 495-512.

71.) L. Kim, ‘’Russian power plant spills thousands of tons of oil into Arctic region.’’ *NPR Environment, 2020.* Available at https://www.npr.org/2020/06/04/869936256/russian-power-plant-spills-thousands-of-tons-of-oil-into-arctic-region?t=1591350190953. (accessed 17 July 2020*)*.

72.) A. Kramer, ‘’Russia confirms radioactive materials were involved in deadly blast.’’ *The New York Times,* 2019. Available at https://nyti.ms/2ZU8aOo. (accessed 17 July 2020*)*.

73.) T. Nilsen, The Independent Barents Observer, ‘’Arctic countries have been working together to step up nuclear accident preparedness.’’ *Arctic Today,* 2019*.* Available at https://www.arctictoday.com/how-arctic-countries-have-begun-working-together-to-step-up-nuclear-accident-preparedness/. (accessed 17 July 2020).
